# Supplementary material
Source: PubMed Central journal article supplement (PMC3985956)
Supplement: bi5000614_si_001.pdf [file bi5000614_si_001.pdf]

1 **SUPPORTING INFORMATION**

2

3

4 **Table S1.** Strains used in this study.

5

| <b>Strain</b>      | <b>Relevant genotype</b>                                         | <b>Source</b> |
|--------------------|------------------------------------------------------------------|---------------|
| RP437              | WT for chemotaxis                                                | (1)           |
| UU2619<br>("EEEE") | tsr-Q297E/Q311E (EEEE) $\Delta$ (tar-cheB)4346                   | (2)           |
| UU2564<br>("QQQQ") | tsr-E304Q/E493Q [QQQQ] cheA <sup>+</sup> $\Delta$ (tar-cheB)4346 | (2)           |
| HCB326             | $\Delta$ tsr trg:: <i>TnO</i> $\Delta$ cheA-cheZ                 | (3)           |
| CO4                | (cheAW) $\Delta$ 2167 pPM25(CheA CheW) pCO3(tsr-A413T)           | this study    |

6

7

8

9

10

11

12

13

14

15 **Table S2. Summary of WMD-corrected PCA classification**

16

| Sample                                  | # Subvolumes | Components used | Fraction Variance Explained | # Classes | AIC <sup>1</sup> improvement | BIC <sup>2</sup> improvement |
|-----------------------------------------|--------------|-----------------|-----------------------------|-----------|------------------------------|------------------------------|
| Tsr-EEEE                                | 181          | 1-5             | 0.18                        | 2         | <b>52.2862</b>               | <b>23.4386</b>               |
| Tsr-EEEE                                | 181          | 1-5             | 0.18                        | 4         | 7.1891                       | -79.3537                     |
| Tsr-QQQQ                                | 60           | 1-5             | 0.16                        | 2         | -15.9904                     | -38.2131                     |
| Tsr, CheA, CheW overexpression          | 100          | 1-6             | 0.15                        | 2         | -47.0031                     | -72.2907                     |
| Tsr, CheA, CheW overexpression          | 100          | 1-6             | 0.15                        | 4         | <b>113.43</b>                | <b>21.0942</b>               |
| <i>In vitro</i> Tsr-CF, CheA, CheW, PEG | 140          | 1-5             | 0.19                        | 2         | <b>121.278</b>               | <b>93.971</b>                |
| <i>In vitro</i> Tsr-CF, CheA, CheW, PEG | 140          | 1-4             | 0.17                        | 6         | <b>346.906</b>               | <b>238.707</b>               |

17 <sup>1</sup>Akaike Information Criterion, Value indicates improvement compared to one class

18 <sup>2</sup>Bayes Information Criterion, Value indicates improvement compared to one class

19 \* Bold indicates significance

20

21

22 **Figure S1. Classification of *E. coli* chemoreceptor array hexagons in cells expressing**  
23 **Tsr-QQQ reveals ordered CheA occupancy.**

24 Classification by principal components analysis and k-means clustering of hexagons  
25 results in two classes similar to those observed in Tsr-EEEE (Figure 1). Average of class  
26 1 (n=39) is shown in green at left, class 2 (n=21) in turquoise in the middle. Organization  
27 of classes in the array patch is shown at right, with yellow representing particles not  
28 included in the clustering.

29

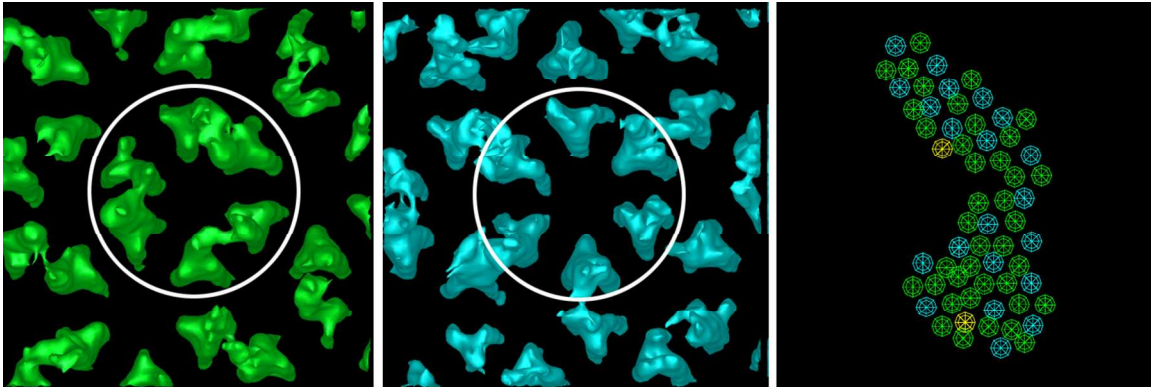

30

31 **Figure S2. Tomographic slice showing overview of *in vitro* complex assembly.** Scale  
32 bar 100nm.

33

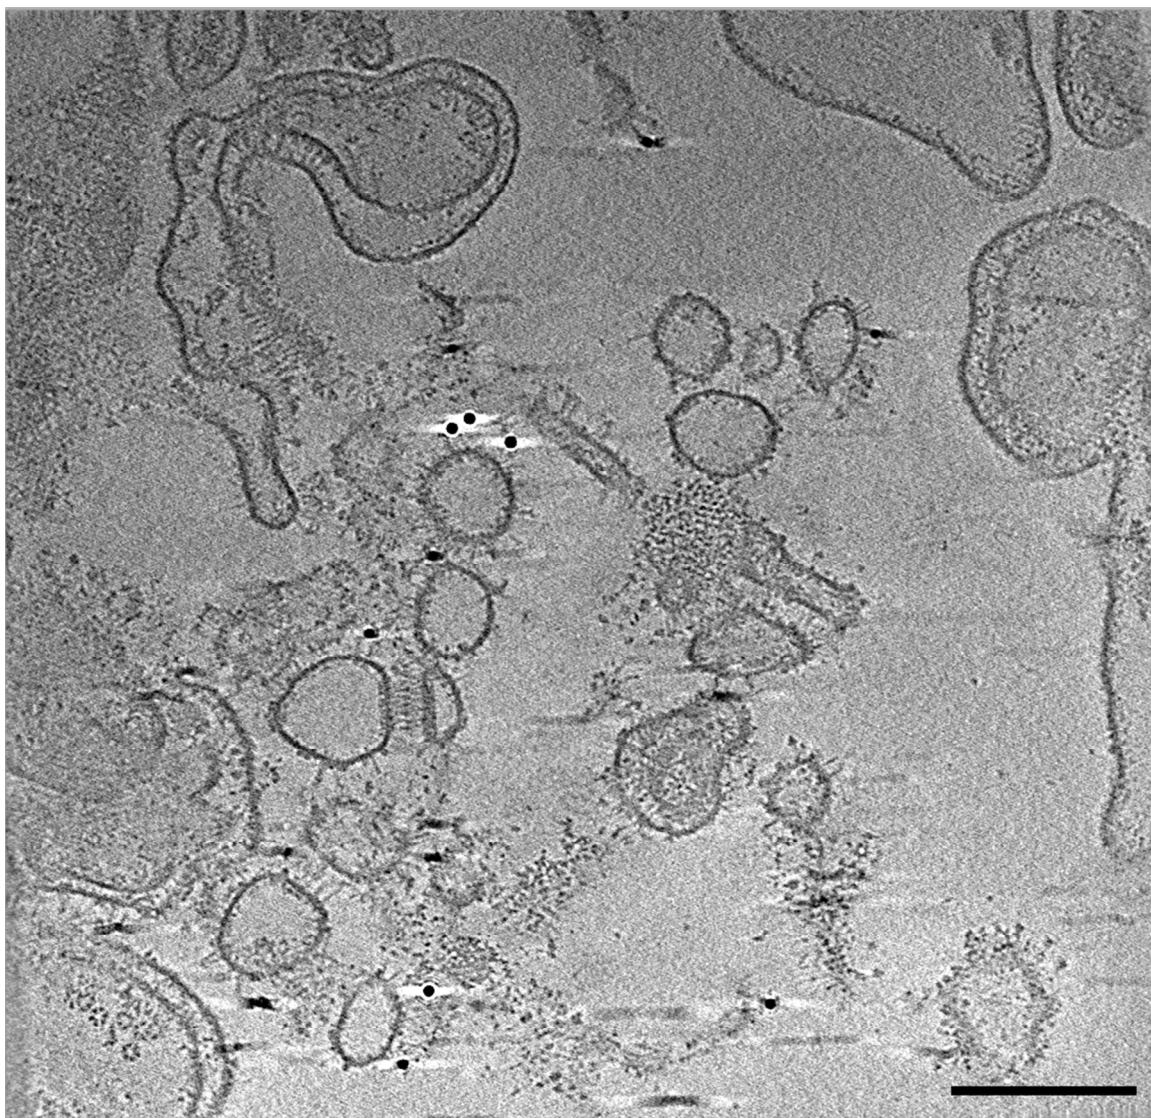

34

35

36

37 **Figure S3. *In vitro* receptor hexagons are associated with three CheA dimers.**  
38 Tomographic slice of an *in vitro* preparation of Tsr in inner membrane vesicles following  
39 addition of CheA and CheW. Isosurface representation (left inset) of a cut-out section at  
40 the level of the CheA/W ring from the receptor hexagon (right inset) highlighted by the  
41 yellow circle. Yellow arrows indicate densities corresponding to CheA dimers.  
42

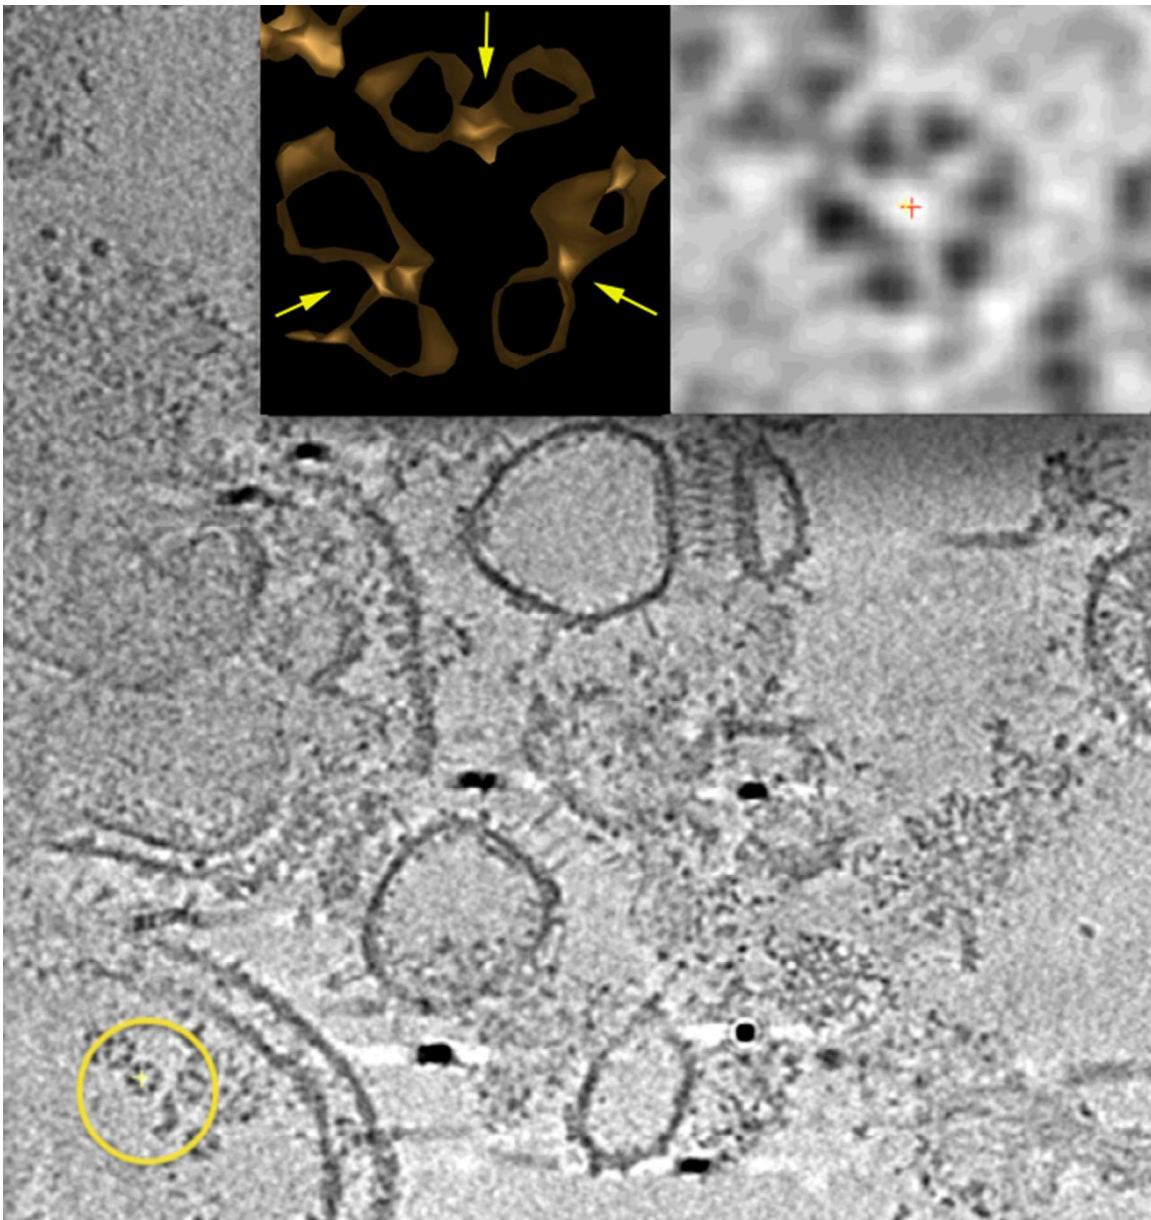

43

44 **Figure S4. Relative protein levels of CheA and Tsr overexpression.** Western blot  
45 showing levels of CheA (top left), Tsr (top right), and a loading control (bottom;  
46 unknown protein detected by  $\alpha$ - $\beta$ -lactamase) in RP437, UU2619, and CO4.  
47 Quantification by densitometry gives the following overexpression levels:  
48 CO4/RP437 CheA 25.5, Tsr 26  
49 CO4/UU2619 CheA 33.7, Tsr 15.5.  
50

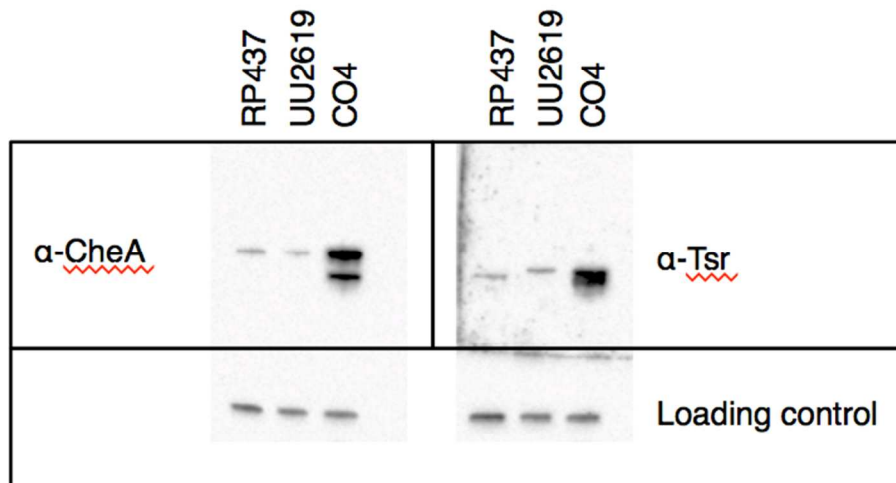

51  
52  
53  
54  
55  
56  
57

58 **Figure S5. Classification of array hexagons formed by co-overexpression of Tsr,**  
59 **CheA, and CheW.** Classification by principal components analysis and k-means  
60 clustering of hexagons in the array patch shown in Figure 3 results in 4 classes. Average  
61 of class 1 (n=54) is shown in green at left, class 2 (n=40) in turquoise in the middle.  
62 Class 3 (purple, n=4) and Class 4 (yellow, n=2) represented bad particles. Organization  
63 of classes in the array patch is shown at right, with red representing particles not included  
64 in the clustering. Note that colors denote the relative abundance of the classes and do not  
65 correspond to the classes in Figure 1.

66

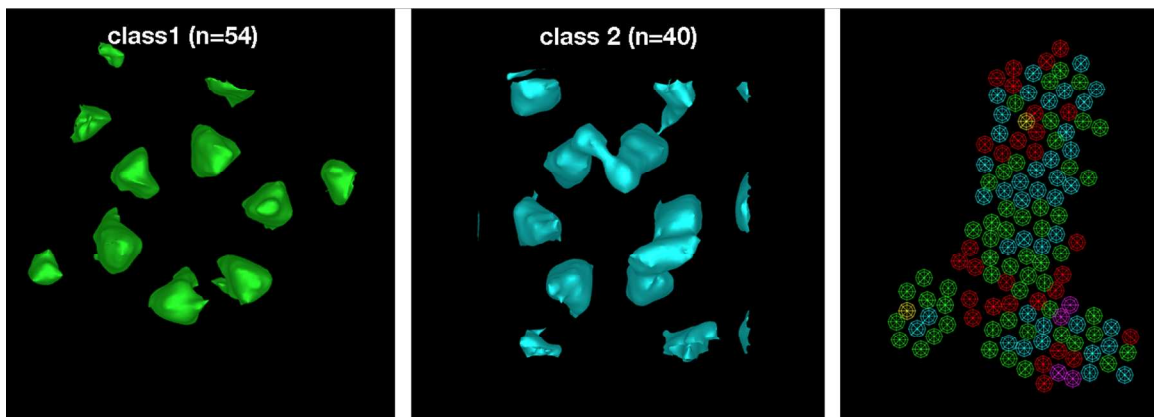

67

68

69

70 **Figure S6. Cytoplasmic chemoreceptor array in *Vibrio cholerae*.** Side view of a  
71 cytoplasmic chemoreceptor array (CA). PA: polar chemoreceptor array, IM: inner  
72 membrane, OM: outer membrane.  
73

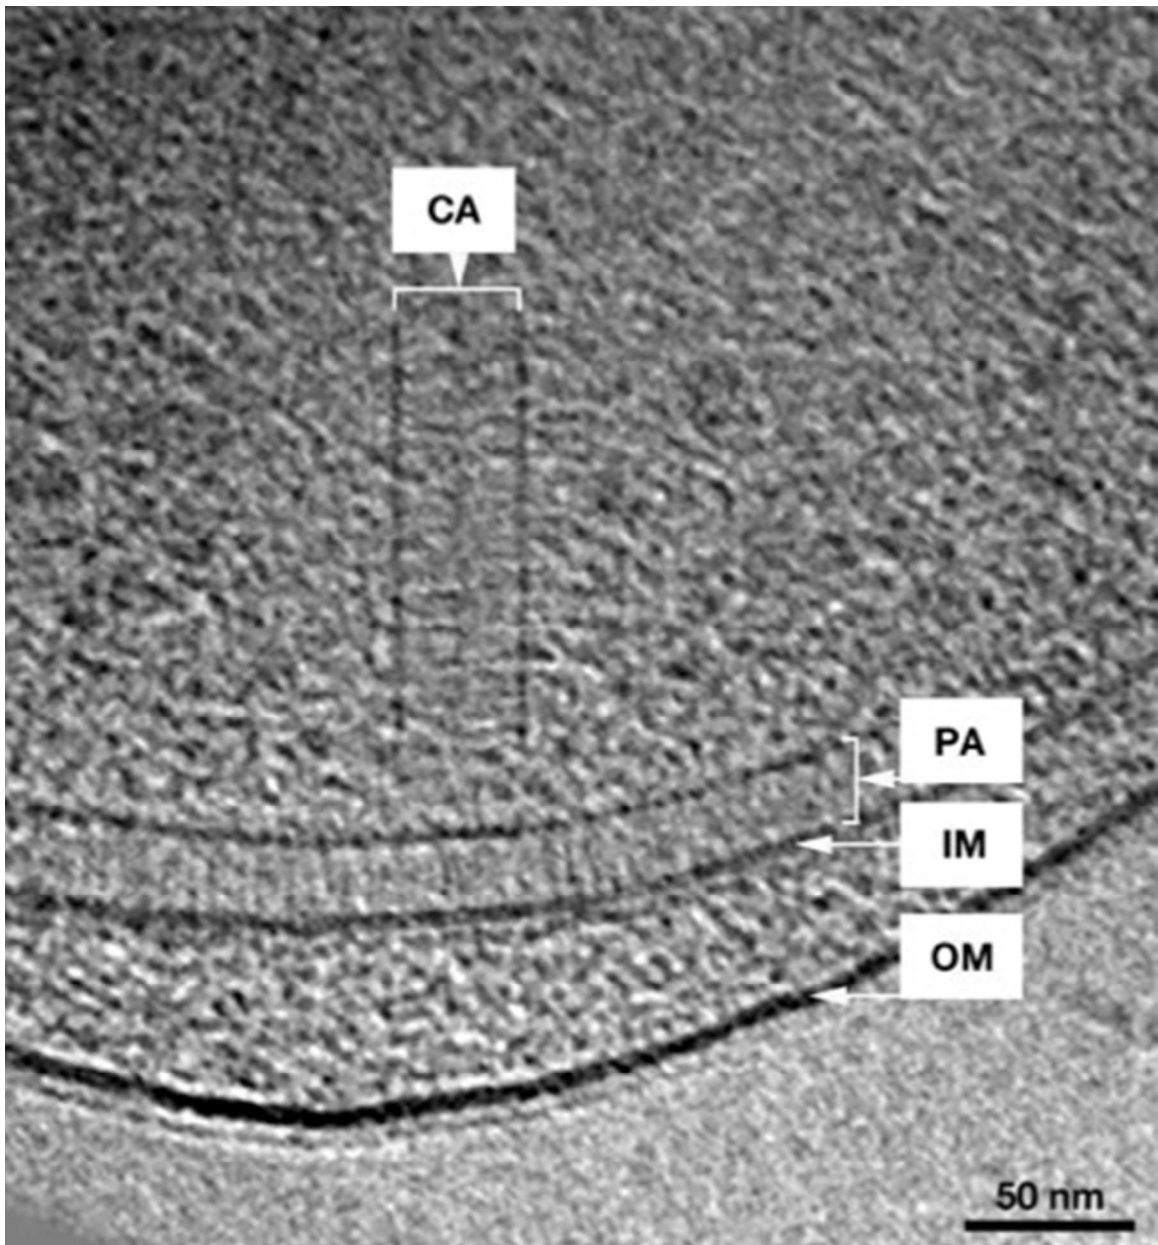

74  
75



76 **Figure S7. Arrangement of cytoplasmic receptor fragments assembled *in vitro* with**  
77 **CheA, CheW, and molecular crowding agents.** Three tomographic slices through a  
78 12-nm array show ordered chemoreceptor lattices at the top (left) and bottom (right), with  
79 loss of order at their interacting tips (middle). Bar 100nm.

80

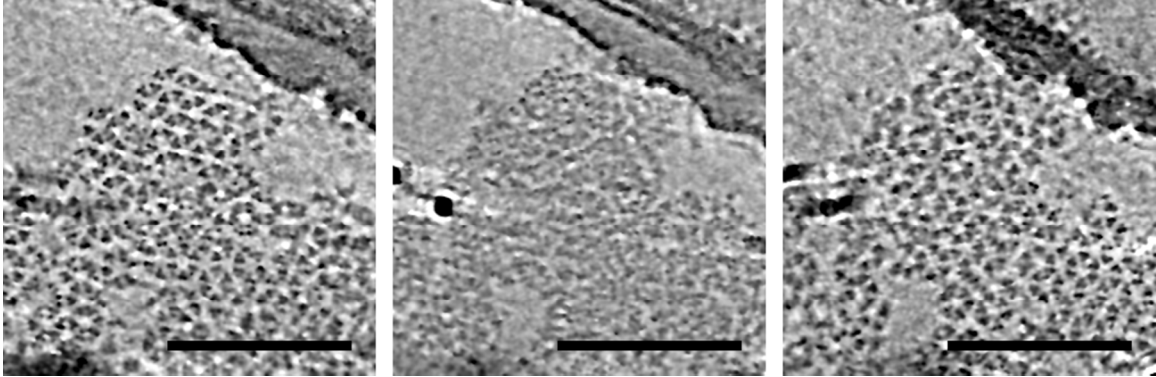

81

82

83

84

85 **Figure S8. Classification of array hexagons formed by *in vitro* assembly of Tsr-CF,**  
86 **CheA, CheW, and a molecular crowding agent.** Classification by principal  
87 components analysis and k-means clustering of hexagons in the array patch shown in  
88 Figure 6 results in 6 classes. Average of class 1 (2 CheA dimers; n=40) is shown in  
89 green, class 2 (3 CheA dimers; n=39) in turquoise, class 3 (1 CheA dimer; n=29) in  
90 purple, and class 4 (no CheA; n=24) in yellow. Class 5 (blue, n=7) and Class 6 (red,  
91 n=1) represented bad particles. Organization of classes in the array patch is shown at  
92 right. Asterisk in class 3 indicates a connecting density at the receptor tips, not CheA.  
93 Note that colors correspond to the relative abundance of the classes and do not  
94 correspond to classes in previous figures.

95

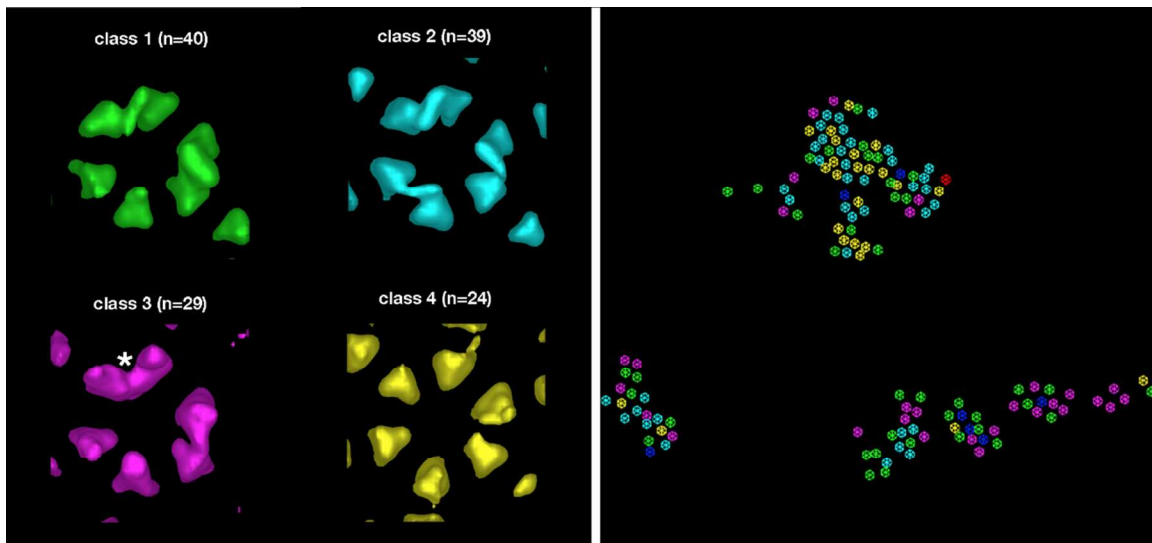

96

97

98 References:

- 99 1. Parkinson, J. S., and Revello, P. T. (1978) Sensory adaptation mutants of *E. coli*,  
100 *Cell* 15, 1221-1230.
- 101 2. Briegel, A., Ames, P., Gumbart, J., Oikonomou, C. M., Parkinson, J. S., and  
102 Jensen, G. J. (2013) The mobility of two kinase domains in the Escherichia coli  
103 chemoreceptor array varies with signaling state, *Mol Microbiol* 89, 831-841.
- 104 3. Wolfe, A. J., Conley, P., Kramer, T. J., and Berg, H. C. (1987) Reconstitution of  
105 signaling in bacterial chemotaxis, *J Bacteriol* 169, 1878-1885.
- 106
- 107
